# Supplementary material for: Cyclic Voltammetry of C.I. Disperse Orange 62 in an Aqueous Electrolyte
Source: MDPI journal article supplement (doi:10.3390/ma16216901), 2023-10-27
Supplement: s1 [file s1]

## Supplementary Information

### Cyclic Voltammetry of C.I. Disperse Orange 62 in an Aqueous Electrolyte

**Table S1.** Composition of DO62 solutions in LiCl/DMF electrolyte used for CV experiments and cathodic peak potential  $(I_p)_c$  and anodic peak potential  $(I_p)_a$ .

| Solution | $c(\text{DO62})$<br>$\text{g L}^{-1}$ | $c(\text{LiCl})$<br>$\text{g L}^{-1}$ | Scan rate<br>$\text{mV s}^{-1}$ | $(I_p)_c$<br>$\mu\text{A}$ | $(I_p)_a$<br>$\mu\text{A}$ |
|----------|---------------------------------------|---------------------------------------|---------------------------------|----------------------------|----------------------------|
| 1        | 2.05                                  | 9.39                                  | 5                               | 10                         | 2.5                        |
|          |                                       |                                       | 10                              | 12.5                       | 5                          |
|          |                                       |                                       | 20                              | 25                         | 8.75                       |
|          |                                       |                                       | 50                              | 27.5                       | 10                         |
|          |                                       |                                       | 100                             | 57.5                       | 12.5                       |
| 2        | 4.10                                  | 8.72                                  | 5                               | 20                         | 10                         |
|          |                                       |                                       | 10                              | 25                         | 17.5                       |
|          |                                       |                                       | 20                              | 42.5                       | 20                         |
|          |                                       |                                       | 50                              | 67.5                       | 22.5                       |
|          |                                       |                                       | 100                             | 110                        | 22.5                       |
| 3        | 6.16                                  | 8.05                                  | 5                               | 32.5                       | 10                         |
|          |                                       |                                       | 10                              | 32.5                       | 12.5                       |
|          |                                       |                                       | 20                              | 60                         | 25                         |
|          |                                       |                                       | 50                              | 100                        | 37.5                       |
|          |                                       |                                       | 100                             | 145                        | 37.5                       |
| 4        | 10.25                                 | 6.71                                  | 5                               | 45                         | 5                          |
|          |                                       |                                       | 10                              | 62.5                       | 12.5                       |
|          |                                       |                                       | 20                              | 80                         | 25                         |
|          |                                       |                                       | 50                              | 145                        | 50                         |
|          |                                       |                                       | 100                             | 175                        | 40                         |

**Table S2.** Cathodic peak potential ( $E_p$ )<sub>c</sub> and peak current ( $I_p$ )<sub>c</sub> of C.I. Disperse Orange 62 (2.31 g L<sup>-1</sup>) in aqueous electrolyte in the potential range from -300 mV and -1600 mV, scan rates 5, 10, 20, 50, 100 mV s<sup>-1</sup>; electrolyte: 10 g L<sup>-1</sup> Na<sub>2</sub>SO<sub>4</sub>, 0.6 g L<sup>-1</sup> NaOH.

| $v$<br>mV s <sup>-1</sup> | ( $E_{p1}$ ) <sub>c</sub><br>mV | ( $I_{p1}$ ) <sub>c</sub><br>μA | ( $E_{p2}$ ) <sub>c</sub><br>mV | ( $I_{p2}$ ) <sub>c</sub><br>μA |
|---------------------------|---------------------------------|---------------------------------|---------------------------------|---------------------------------|
| 5                         | -490                            | 0.075                           | (-750)                          | 0.05                            |
| 10                        | -500                            | 0.125                           | -720                            | 0.05                            |
| 20                        | -515                            | 0.2                             | -720                            | 0.075                           |
| 50                        | -530                            | 0.325                           | -730                            | 0.15                            |
| 100                       | -550                            | 0.5375                          | -750                            | 0.275                           |

**Table S3.** Cathodic peak potential ( $E_p$ )<sub>c</sub> and peak current ( $I_p$ )<sub>c</sub> of C.I. Disperse Orange 62 (0.03 g L<sup>-1</sup>) precipitated from DMF solution in the potential range from -300 mV and -1600 mV; electrolyte 10 g L<sup>-1</sup> Na<sub>2</sub>SO<sub>4</sub>, 4 g L<sup>-1</sup> NaOH; scan rates 5, 10, 20, 50, 100 mV s<sup>-1</sup>.

| $v$<br>mV s <sup>-1</sup> | ( $E_{p1}$ ) <sub>c</sub><br>mV | ( $I_{p1}$ ) <sub>c</sub><br>μA | ( $E_{p2}$ ) <sub>c</sub><br>mV | ( $I_{p2}$ ) <sub>c</sub><br>μA |
|---------------------------|---------------------------------|---------------------------------|---------------------------------|---------------------------------|
| 5                         | -475                            | 0.04                            | -690                            | 0.035                           |
| 10                        | -480                            | 0.07                            | -710                            | 0.055                           |
| 20                        | -490                            | 0.12                            | -725                            | 0.105                           |
| 50                        | -510                            | 0.26                            | -745                            | 0.235                           |
| 100                       | -525                            | 0.375                           | -760                            | 0.35                            |

**Table S4.** Cathodic peak potential ( $E_p$ )<sub>c</sub> and peak current ( $I_p$ )<sub>c</sub> of C.I. Disperse Orange 62 (2.7, 5.3, 10.7, 21.3, 42.7, 85.3, mg L<sup>-1</sup>) precipitated from DMF solution, in 10 g L<sup>-1</sup> Na<sub>2</sub>SO<sub>4</sub>, 4.24 g L<sup>-1</sup> NaOH at 100 mV s<sup>-1</sup>

| $c(\text{DO62})$<br>mg L <sup>-1</sup> | ( $E_{p1}$ ) <sub>c</sub><br>mV | ( $I_{p1}$ ) <sub>c</sub><br>μA | ( $E_{p2}$ ) <sub>c</sub><br>mV | ( $I_{p2}$ ) <sub>c</sub><br>μA | ( $E_{p3}$ ) <sub>c</sub><br>mV | ( $I_{p3}$ ) <sub>c</sub><br>μA |
|----------------------------------------|---------------------------------|---------------------------------|---------------------------------|---------------------------------|---------------------------------|---------------------------------|
| 2.7                                    | -520                            | 0.060                           | (-400)                          | (0.005)                         | -760                            | 0.085                           |
| 5.3                                    | -520                            | 0.09                            | -                               | -                               | -750                            | 0.12                            |
| 10.7                                   | -520                            | 0.16                            | -680                            | 0.01                            | -760                            | 0.185                           |
| 21.3                                   | -515                            | 0.23                            | -670                            | 0.02                            | -760                            | 0.24                            |
| 42.7                                   | -520                            | 0.275                           | -670                            | 0.04                            | -750                            | 0.27                            |
| 85.3                                   | -525                            | 0.25                            | -675                            | 0.14                            | -760                            | 0.22                            |

**Table S5.** Cathodic peak potential ( $E_p$ )<sub>c</sub> and peak current ( $I_p$ )<sub>c</sub> of C.I. Disperse Orange 62 (0.03 g L<sup>-1</sup>) precipitated from DMF solution, in the potential range from -250 mV and -1550 mV in 10 g L<sup>-1</sup> Na<sub>2</sub>SO<sub>4</sub>, 4 g L<sup>-1</sup> NaOH, in presence of 0.2 g L<sup>-1</sup> N-cetyl-N,N,N,-trimethyl-ammonium bromide; scan rates 5, 10, 20, 50, 100 mV s<sup>-1</sup>.

| $v$<br>mV s <sup>-1</sup> | ( $E_{p1}$ ) <sub>c</sub><br>mV | ( $I_{p1}$ ) <sub>c</sub><br>μA | ( $E_{p2}$ ) <sub>c</sub><br>mV | ( $I_{p2}$ ) <sub>c</sub><br>μA | ( $E_{p3}$ ) <sub>c</sub><br>mV | ( $I_{p3}$ ) <sub>c</sub><br>μA |
|---------------------------|---------------------------------|---------------------------------|---------------------------------|---------------------------------|---------------------------------|---------------------------------|
| 5                         | -440                            | 0.15                            | -665                            | 0.05                            | -770                            | 0.02                            |
| 10                        | -450                            | 0.23                            | -675                            | 0.05                            | -780                            | 0.02                            |
| 20                        | -460                            | 0.38                            | -685                            | 0.06                            | -785                            | 0.04                            |
| 50                        | -485                            | 0.82                            | -690                            | 0.04                            | -800                            | 0.21                            |
| 100                       | -495                            | 1.28                            | -700                            | 0.03                            | -820                            | 0.46                            |

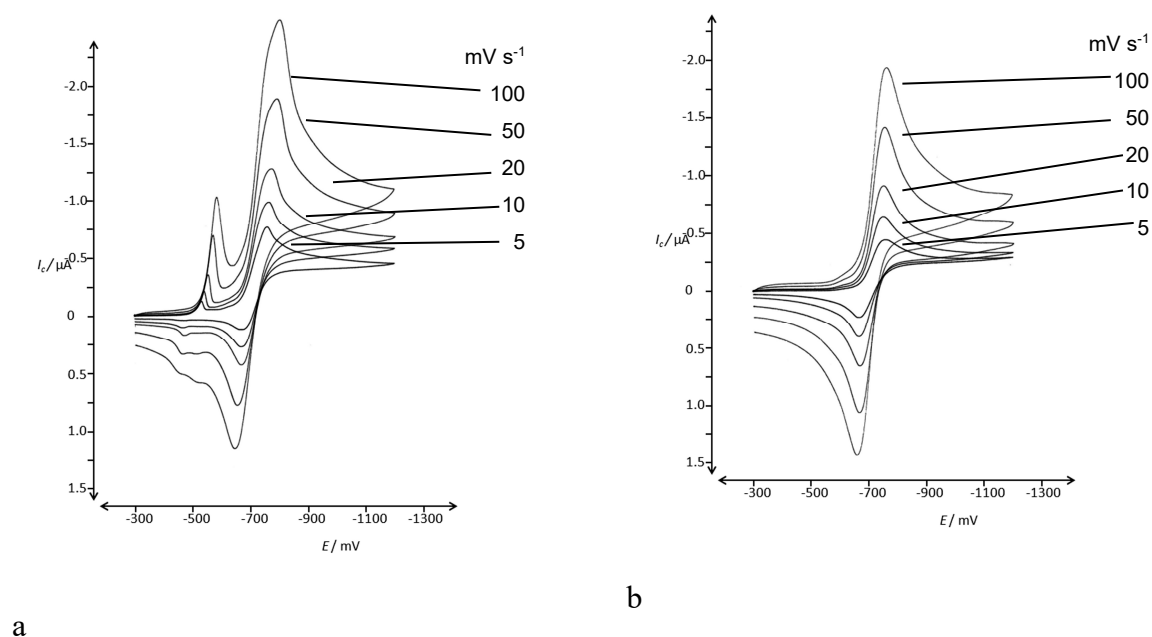

**Figure S1.** a) Cyclic voltammetry of DO62 (1.46 g L<sup>-1</sup>) precipitated from DMF solution in aqueous electrolyte in the potential range from -300 mV and -1200 mV in 10 g L<sup>-1</sup> Na<sub>2</sub>SO<sub>4</sub>, 4 g L<sup>-1</sup> NaOH, in presence of 0.51 mM 9,10- anthraquinone-1,5-disulphonic acid (AQDS) at different scan rates 5, 10, 20, 50, 100 mV s<sup>-1</sup>; b) 0.51 mM 9,10-anthraquinone-1,5-disulphonic acid (AQDS) in the same ground electrolyte at different scan rates 5, 10, 20, 50, 100 mV s<sup>-1</sup>.
